# Supplementary material for: Probing the Nano-Assembly Leading to Periodic Gratings in Poly(p-dioxanone)
Source: MDPI journal article supplement (doi:10.3390/nano13192665), 2023-09-28
Supplement: s1 [file s1]

## Supporting Information

### Probing the Nano-Assembly Leading to Periodic Gratings in Poly(p-dioxanone)

*Min-Han Hao<sup>1</sup>, Selvaraj Nagarajan<sup>1\*</sup>, and Eamor M. Woo<sup>1\*</sup>*

<sup>1</sup>Department of Chemical Engineering, National Cheng Kung University  
No. 1, University Road, Tainan, 701-01, Taiwan

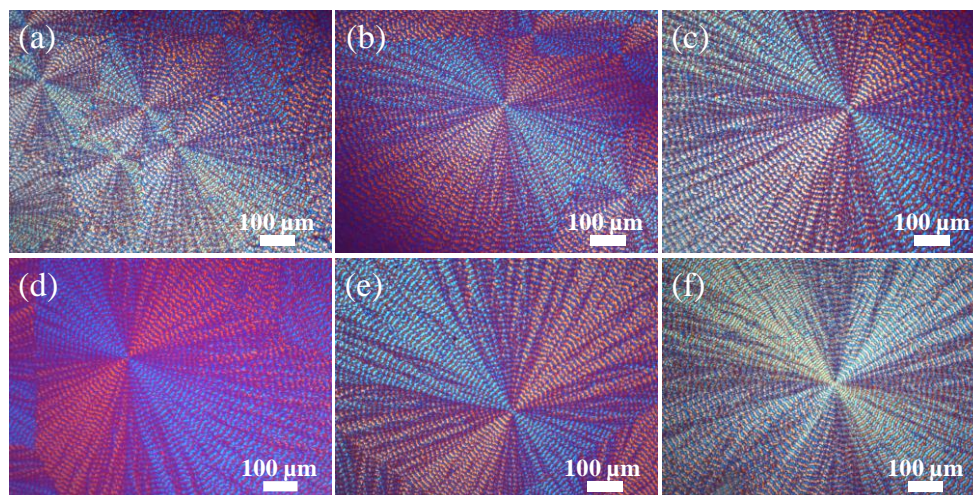

**Figure S1.** POM graphs of PPDO/PVA (95/5) blend crystallized with top-glass cover at various  $T_c$  (a) 45 °C, (b) 50 °C, (c) 55 °C, (d) 60 °C (e) 65 °C, (f) 70 °C.

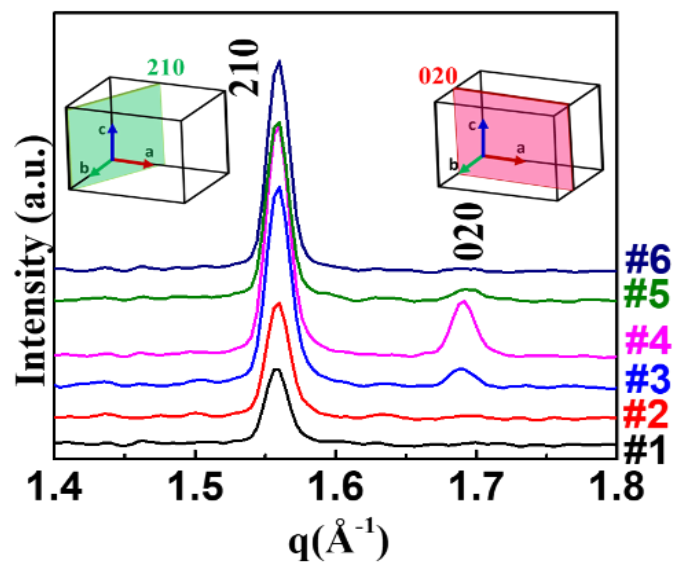

**Figure S2:** 1D-WAXD profiles of spot #1 to #6 in a ring-banded spherulite of PPDO/PVA (95/5) blend crystallized at  $T_C = 65 \text{ }^\circ\text{C}$ .

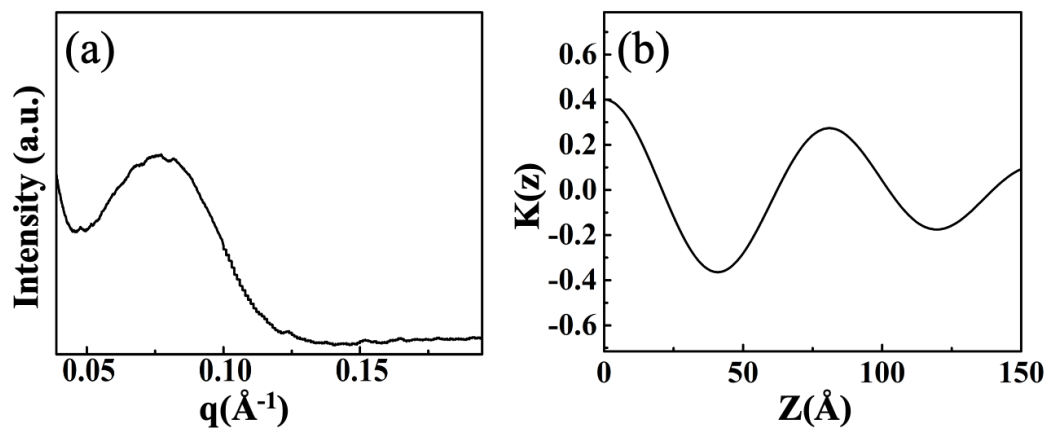

**Figure S3.** Synchrotron microbeam X-ray diffraction results (a) 1D correlation profile, and (b) 1D correlation function of PPDO/PVA (95/5) ring-banded spherulite crystallized at  $T_C = 65\text{ }^{\circ}\text{C}$ .
